# Supplementary material for: A novel fabrication of a well distributed and aligned carbon nanotube film electrode for dye-sensitized solar cells
Source: Royal Society of Chemistry journal article supplement (doi:10.1039/c2jm31954c), 2012-01-01
Supplement: c2jm31954c.pdf [file c2jm31954c.pdf]

## Supporting Information

### Experimental section

Fluorine-doped tin oxide was obtained from Nippon Sheet Glass Co.; Japan. polyethylene naphthalate was obtained from Peccell Co.; Japan. Titanium dioxide slurry (DHS-TPP3 and DHS-TPP200; Hydrothermal TiO<sub>2</sub>; dispersion phase of terpinol) and powder (DHS-SN1760-500) were obtained from Dalian Heptachroma Solartech Co.; Ltd.

The working mechanism for a dye-sensitized solar cell may be briefly described as below: dye molecules are excited by absorbing photons and inject electrons into the conduction band of TiO<sub>2</sub>; electrons move along the external circuit and arrive at the carbon nanotube (CNT) film, where I<sup>3-</sup> ions are reduced to I<sup>-</sup> ions; dye molecules are finally regenerated by the I<sup>-</sup> ions to complete a cycle. CNTs had been widely studied to catalyze the reduction reaction of I<sup>3-</sup> ions, and the aligned CNT film with a high electrical conductivity further improves the catalysis, so the resulting cells are expected to show high performances.

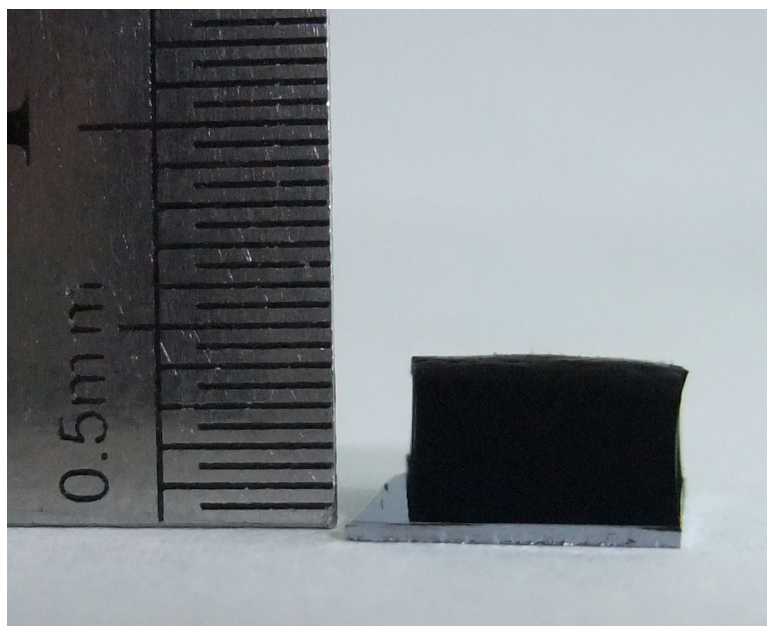

**Figure S1.** Photograph of a MWCNT array synthesized by chemical vapor deposition.

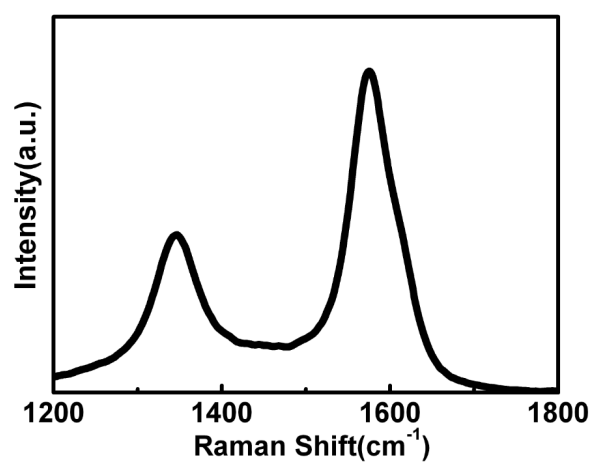

**Figure S2.** Raman spectrum of a CNT film.

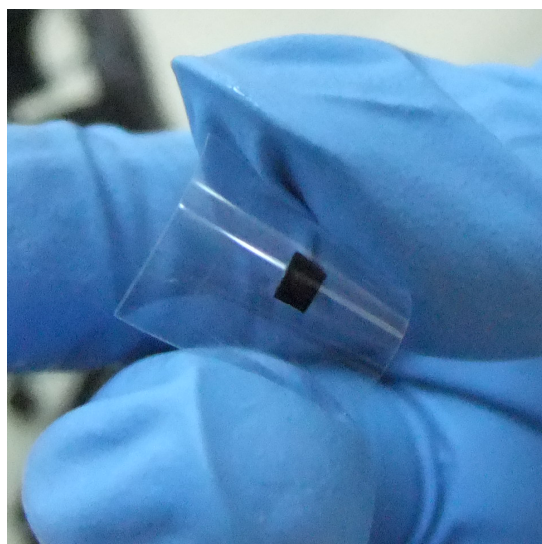

**Figure S3.** Photograph of a flexible MWCNT film.

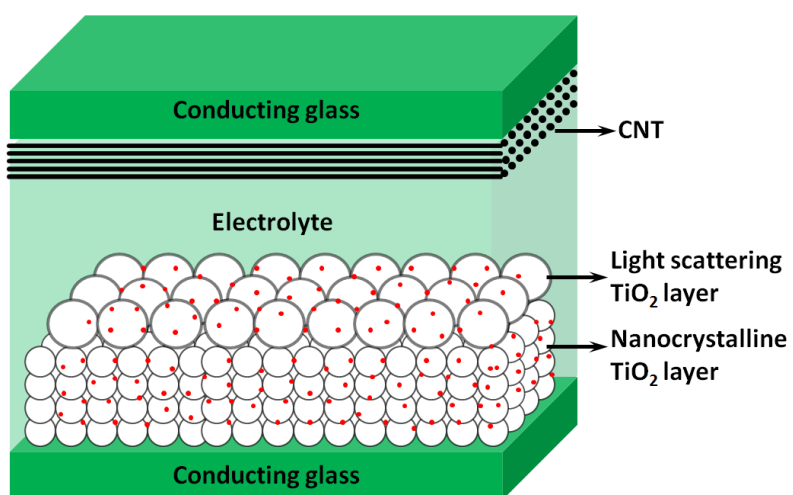

**Figure S4.** Schematic diagram of a dye-sensitized solar cell by using the MWCNT film as counter electrode.

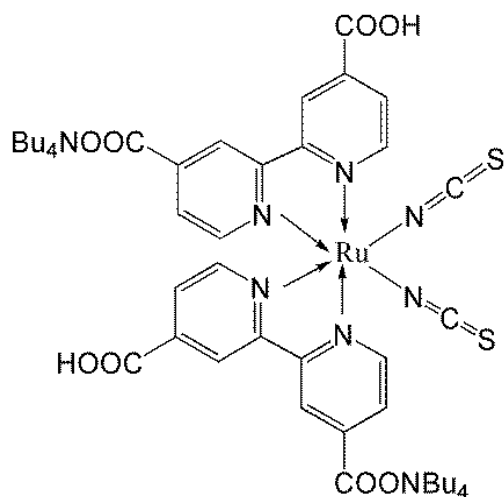

**Figure S5.** Chemical structure of N719.

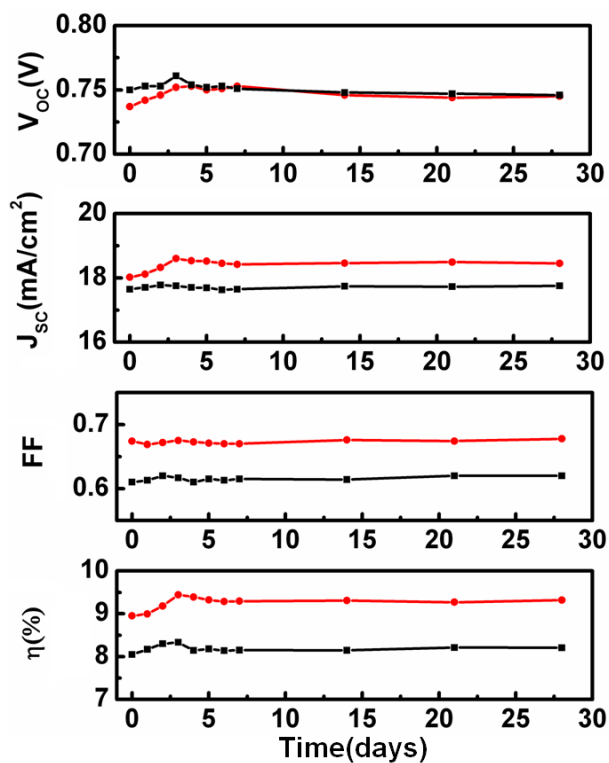

**Figure S6.** Evolution of photovoltaic parameters with the MWCNT film (red line) and platinum (black line) as counter electrode. The used MWCNT film with thickness of 4  $\mu\text{m}$  and MWCNT number density and  $2 \times 10^{11} \text{ cm}^{-2}$  was prepared from an array with height of 1.5 mm.
